# Supplementary material for: Consolidated bioprocessing of lignocellulose for production of glucaric acid by an artificial microbial consortium
Source: bioRxiv preprint, doi:10.1101/2020.04.13.039354, version 1 (2020-04-13)
Supplement: Figure S2 [file 039354_file11.docx]

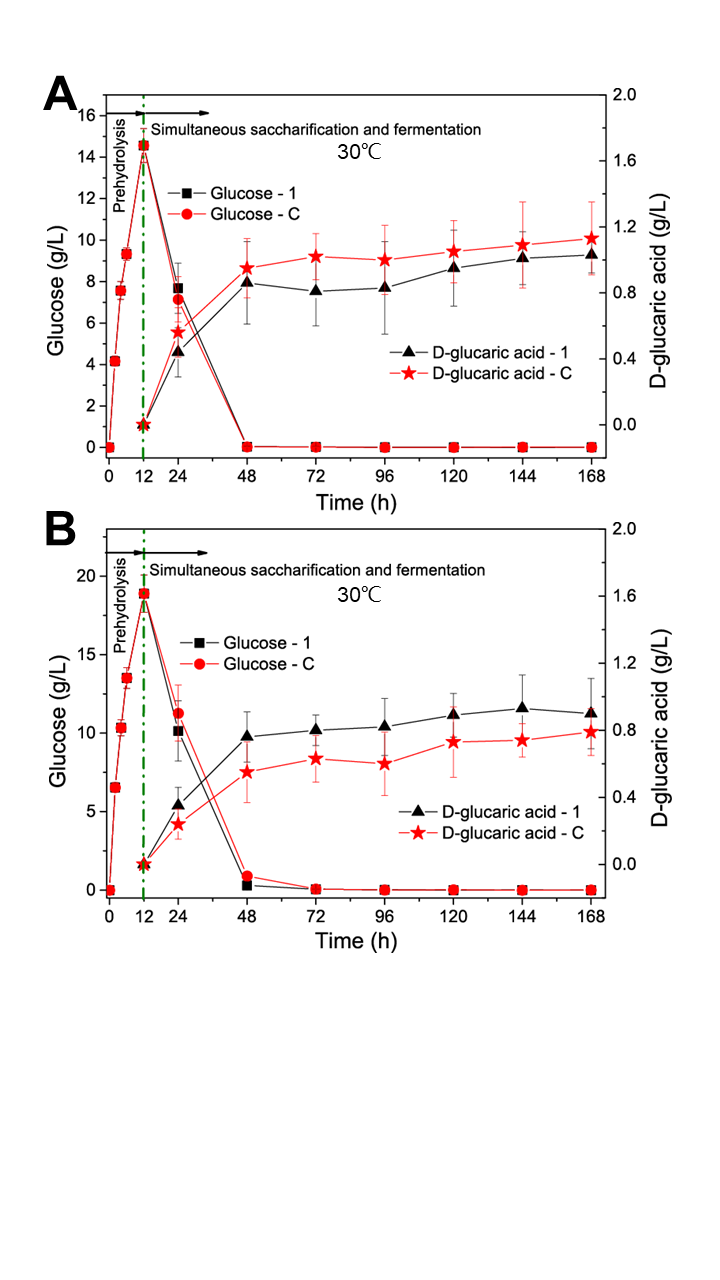


Fig. S2. Simultaneous saccharification and fermentation of Avicel (A) and steam-exploded corn stover (B) at 30℃ from 12 h to 168 h after enzymatic prehydrolysis at 50℃ for 12 h. LGA-1 and LGA-C are the engineered *S. cerevisiae* strains capable of producing D-glucaric acid. Data shown here are average values of at least three biological replicates and error bars are standard deviations.
