# Supplementary material for: Consolidated bioprocessing of lignocellulose for production of glucaric acid by an artificial microbial consortium
Source: bioRxiv preprint, doi:10.1101/2020.04.13.039354, version 1 (2020-04-13)
Supplement: Figure S8 [file 039354_file17.docx]

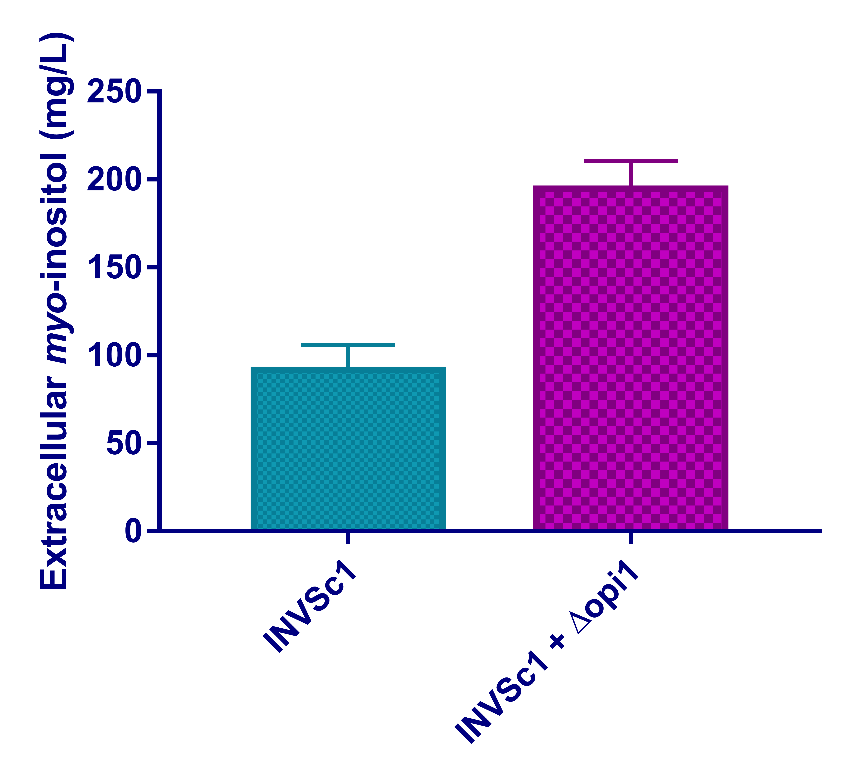


Fig. S8. Concentrations of *myo*-inositol produced by *S. cerevisiae* strains after 5 d fermentation on YPD medium. INVSc1 was the starting strain, and INVSc1 + Δopi1 the engineered *S. cerevisiae* whose *opi1* was knocked out. Data shown here are average values of at least three biological replicates and error bars are standard deviations.
